# Supplementary material for: Long-range light-modulated charge transport across the molecular heterostructure doped protein biopolymers
Source: Royal Society of Chemistry journal article supplement (doi:10.1039/d1sc00487e), 2021-01-01
Supplement: d1sc00487e1.pdf [file d1sc00487e1.pdf]

## Supporting Information

### **Long-range light-modulated charge transport across molecular heterostructures doped protein biopolymers**

Somen Mondal<sup>\*a,b</sup>, Nandan Ghorai<sup>c</sup>, Soumyadip Bhunia<sup>d</sup>, Hirendra. N. Ghosh<sup>c</sup>, and Nadav Amdursky<sup>\*a</sup>

<sup>a</sup>Schulich Faculty of Chemistry, Technion-Israel institute Of Technology, Haifa 3200003, Israel

<sup>b</sup>Institute of Chemical Technology, Mumbai, Marathwada Campus, Jalna, Maharashtra 431 203, India

<sup>c</sup>Institute of Nano science and Technology, Mohali, Punjab 160064, India

<sup>d</sup>Indian Institute of Science Education and Research (IISER) Kolkata Mohanpur, West Bengal 741246, India

\*Corresponding Author: Somen Mondal: [s.mondal@marj.ictmumbai.edu.in](mailto:s.mondal@marj.ictmumbai.edu.in),

Nadav Amdursky: [amdursky@technion.ac.il](mailto:amdursky@technion.ac.il)

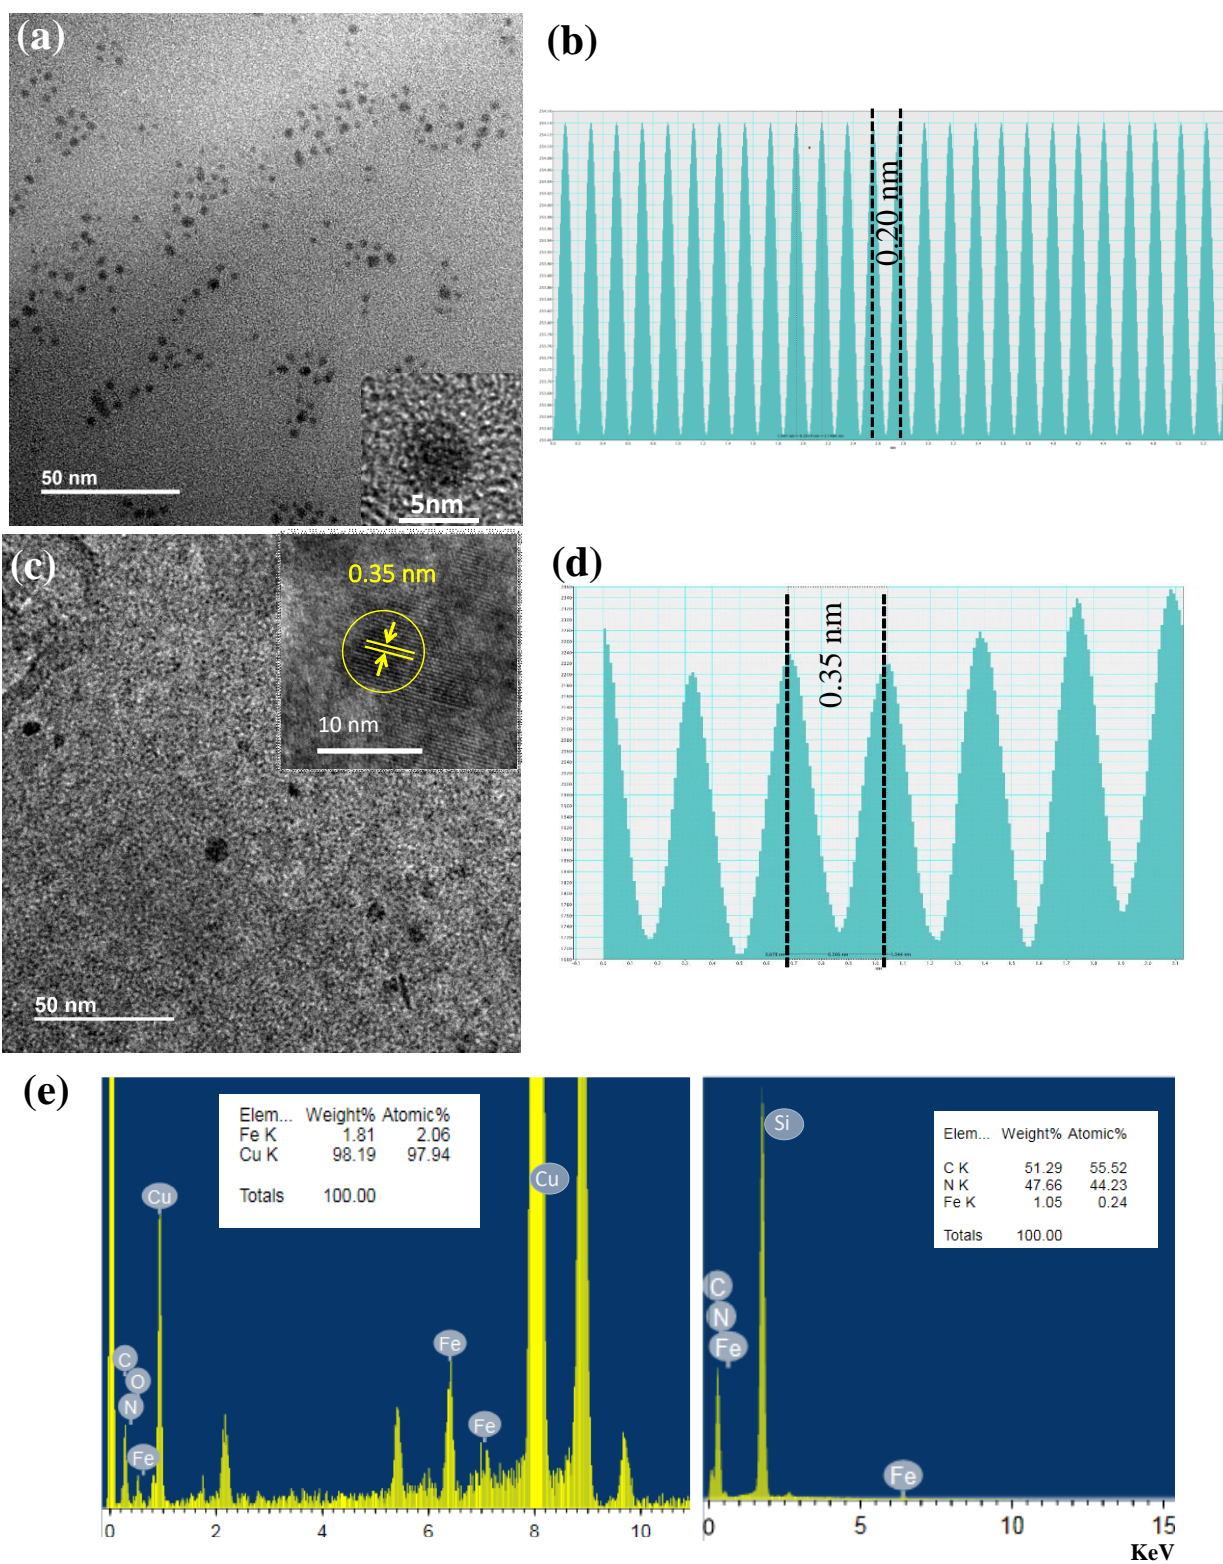

**Figure S1:** (a) HRTEM image (b) FFT of C-Dot (c) HRTEM image (d) FFT of C-Dot-Hemin HS (e) EDS analysis of C-Dot-Hemin HS using (left) C-coated Cu grid in a TEM setup, and (right) Si wafer in a SEM setup.

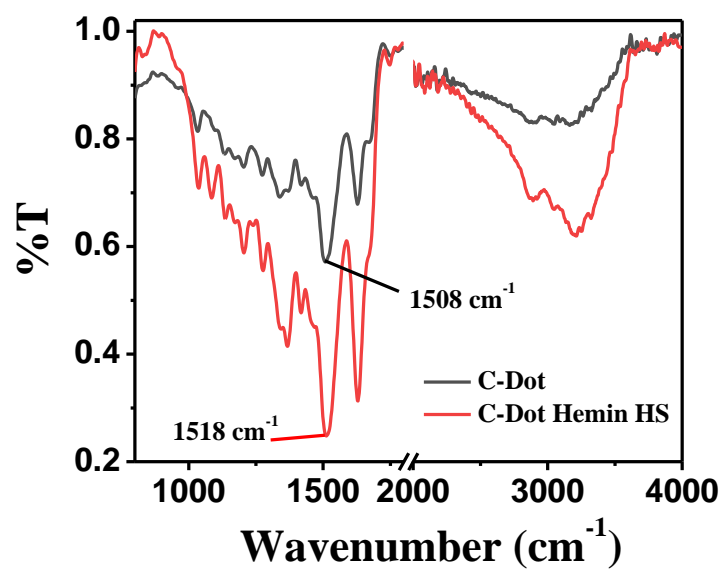

**Figure S2:** FTIR spectrum of C-Dot and C-Dot Hemin HS.

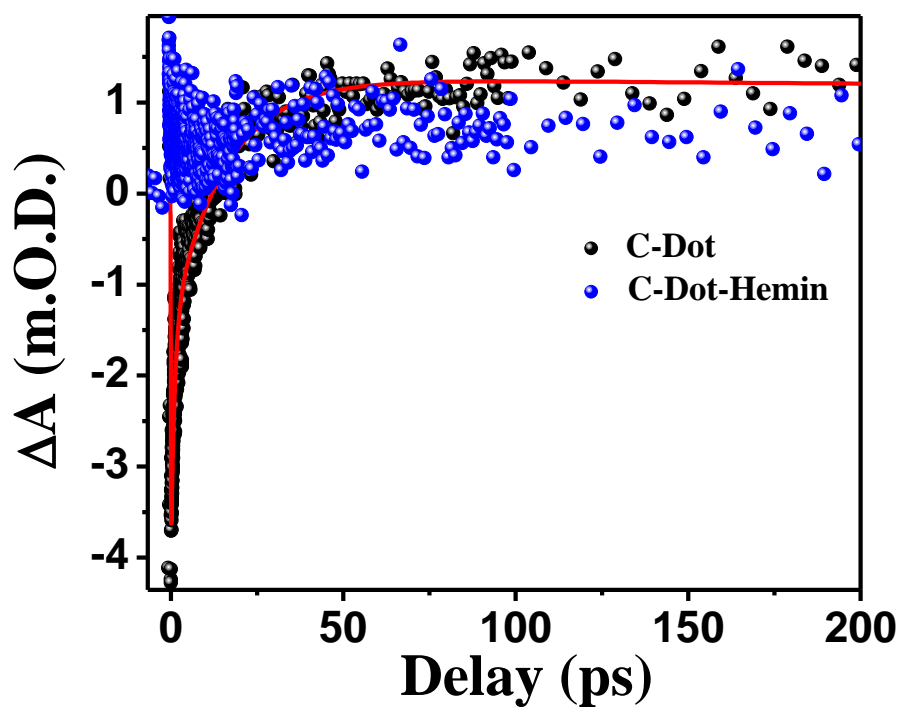

**Figure S3:** Kinetics of bleach recovery at 340 nm after exciting the all the samples at 320 nm laser pulse.

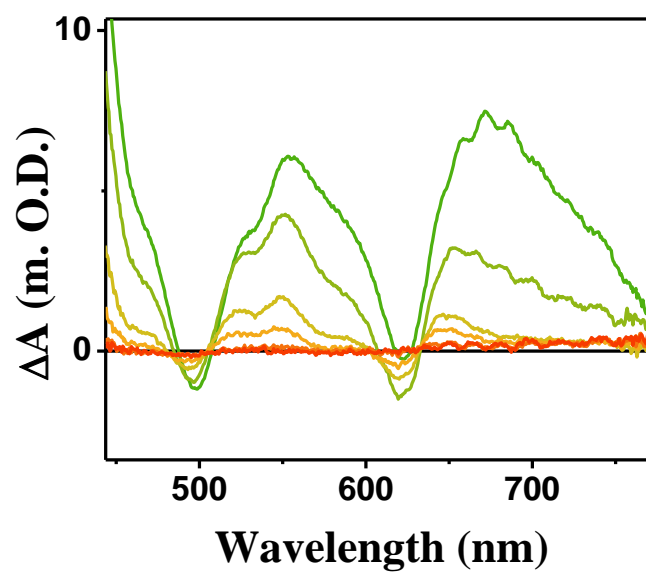

**Figure S4:** TA spectra Hemin in the range of 100 fs to 1 ns delay after 400 nm laser excitation and probing at UV-Vis range.

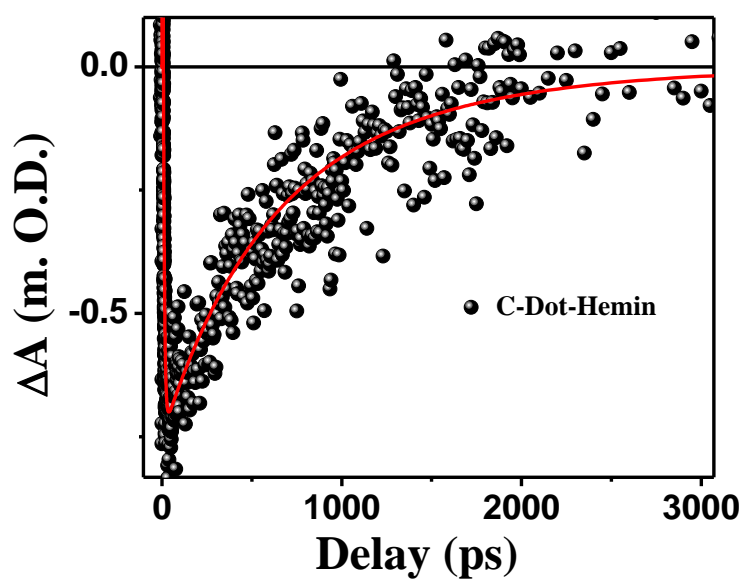

**Figure S5:** Kinetics of bleach recovery at 455 nm after exciting the all the samples at 400 nm laser pulse.

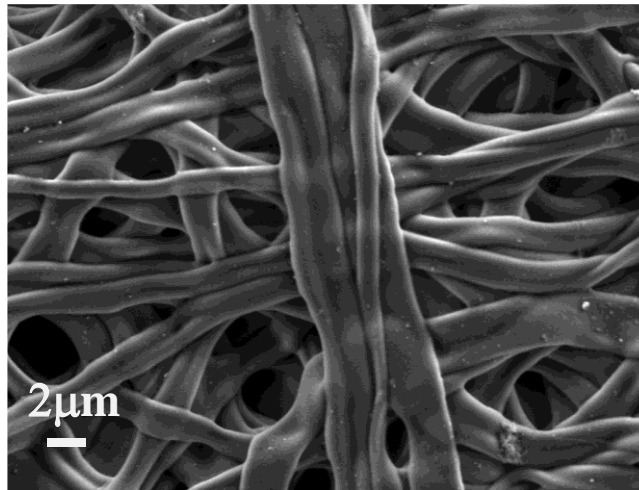

**Figure S6:** SEM image of BSA mat

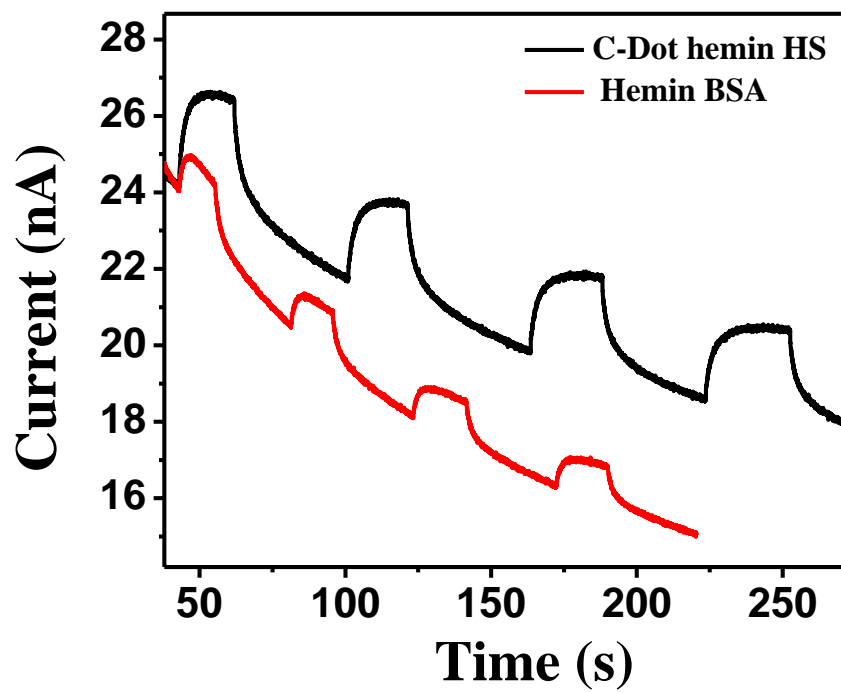

**Figure S7:** Current vs time plot at fixed bias voltage 0.5 V of hemin (red) and C-Dot-Hemin HS (black) doped BSA mats measured with Au electrodes.

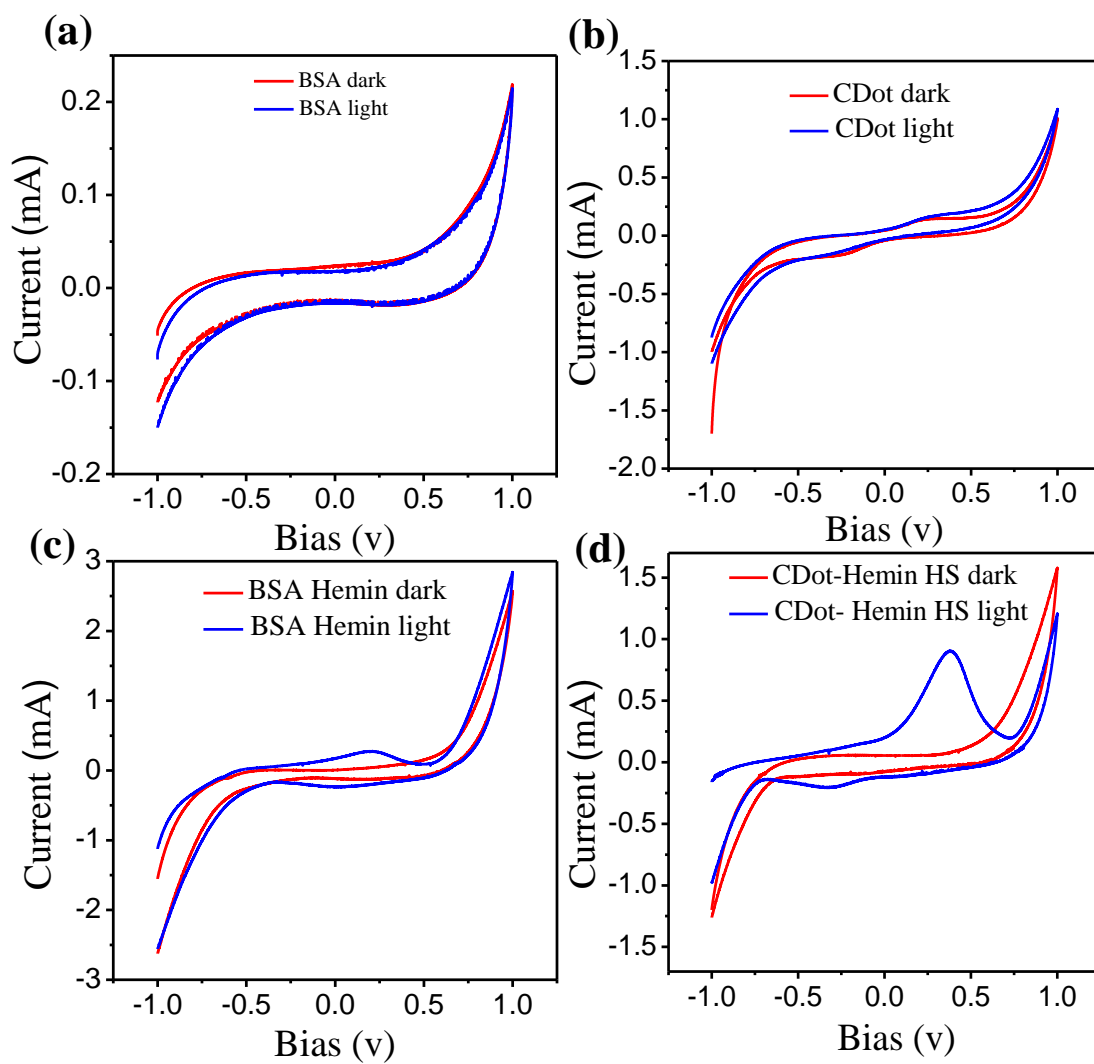

**Figure S8:** DC current-voltage across (a) nondoped (b) C-Dot (c) Hemin ((d) C-Dot-Hemin HS doped BSA mats measured with Au electrodes.

**Table S1:** Multi-exponential fitting of the kinetics at 455, 555 and 625 nm of doped C-Dots after excitation at 400 nm.

| <b>455 nm</b>      |                           |                     |                     |                     |
|--------------------|---------------------------|---------------------|---------------------|---------------------|
| <b>Sample</b>      | $\tau_{1g}$ ( $a_{1g}$ %) | $\tau_1$ ( $a_1$ %) | $\tau_2$ ( $a_2$ %) | $\tau_3$ ( $a_3$ %) |
| <b>C-Dot-Hemin</b> | 6.5 ps (100)              | 480 ps (78%)        | >1 ns (22%)         |                     |
| <b>555 nm</b>      |                           |                     |                     |                     |
| <b>Hemin</b>       | 120 fs (100)              | -                   | 1 ps (92%)          | 200 ps (8%)         |
| <b>C-Dot-Hemin</b> | <100 fs (100)             | 350 fs (54%)        | 3.5 ps (40%)        | 180 ps (6%)         |
| <b>625 nm</b>      |                           |                     |                     |                     |
| <b>Hemin</b>       | 520 fs (100)              | -                   | 3 ps (93%)          | 200 ps (7%)         |
| <b>C-Dot-Hemin</b> | 350 fs (100)              | 1.5 ps (44%)        | 7.5 ps (50%)        | 180 ps (6%)         |
